# Supplementary material for: Presynaptic BK channel localization is dependent on the hierarchical organization of alpha-catulin and dystrobrevin and fine-tuned by CaV2 calcium channels
Source: PubMed Central journal article supplement (PMC4411755; doi:10.1186/s12868-015-0166-2), 2015-04-24

**A**

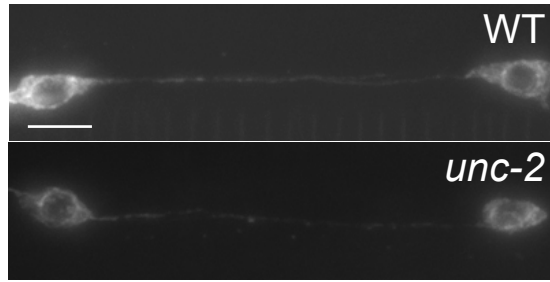

**B**

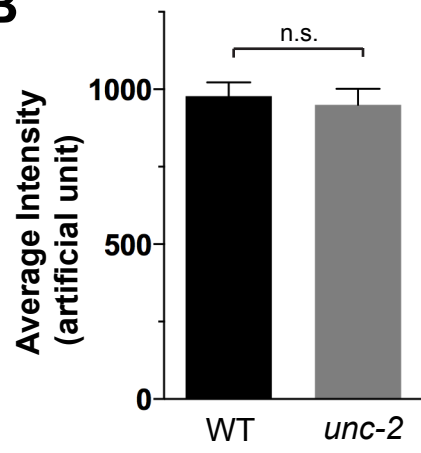

Supplement: 12868_2015_166_MOESM4_ESM.pdf [file 12868_2015_166_MOESM4_ESM.pdf]
